# Supplementary material for: Taxonomy and Ecology of Sympatric Ampelisca Species (Crustacea, Amphipoda) From the Strait of Gibraltar to the Strait of Dover, North-Eastern Atlantic
Source: Frontiers journal article supplement (doi:10.3389/fmars.2021.643078), 2021-03-15
Supplement: Data_Sheet_1.docx [file Data_Sheet_1.docx]

**Appendix A.** **North-eastern Atlantic** **continental shelf and bathyal *Ampelisca* species recorded from the Strait of Gibraltar to the Strait of Dover**

The depth range mentioned for each species is solely based on the data recorded in the study area. CS stands for Continental Shelf, 0-200 m and B for Bathyal, below 200 m.

*1 Ampelisca aequicornis* Bruzelius, 1859

Dauvin & Bellan-Santini, 1986. Chevreux collection, South Brittany, North of the Bay of Biscay (France).

Bellan-Santini & Dauvin, 1988. North and South Bay of Biscay.

Dauvin & Bellan-Santini, 1996. SE Bay of Biscay.

Bachelet et al., 2003. South Bay of Biscay.

CS and B: 30-400 m.

*2 Ampelisca anophthalma* Bellan-Santini & Kaim-Malka, 1977

Marques & Bellan-Santini, 1993. Portuguese continental slope.

B: 500 m.

*3 Ampelisca amblyops* Sars, 1895

Dauvin & Bellan-Santini, 1986. Chevreux collection, Offshore Galicia.

Bellan-Santini & Dauvin, 1988. Offshore Galicia (Spain)

CS and B: 120-512 m.

*4 Ampelisca anomala* Sars, 1883

Dauvin & Bellan-Santini, 1986. Chevreux collection, South Brittany, North of the Bay of Biscay (France).

Bellan-Santini & Dauvin, 1988. Bay of Biscay.

Dauvin & Bellan-Santini, 1996. SE Bay of Biscay.

Bachelet et al., 2003. South Bay of Biscay

CS and B: 19-300 m.

*5 Ampelisca armoricana* Bellan-Santini & Dauvin, 1981

Bellan-Santini & Dauvin, 1981. Bay of Morlaix, Western part of the English Channel.

Dauvin & Bellan-Santini, 1986. Chevreux collection, South Brittany, North of the Bay of Biscay (France).

Bellan-Santini & Dauvin, 1988. North and South Brittany.

Marques & Bellan-Santini, 1991, 1993. South Portugal.

Dauvin, 1999. Bay of Morlaix, English Channel.

Martinez & Adarraga, 2003; Martinez et al., 2007. Guipuzcoan continental shelf, Basque Country, Spain.

Bachelet et al., 2003. South Bay of Biscay.

Le Mao, 2006. Saint-Brieuc Bay, Normano-breton Gulf, western English Channel.

Sampaio et al., 2016.

CS: 10-145 m.

*6 Ampelisca brevicornis* (Costa, 1853) (=*Ampelisca bellianus* Bate, 1857; *Ampelisca laevigata* Liljeborg, 1856)

Rodrigues & Dauvin, 1985. Albufeira and Obidos lagoons, Portugal.

Dauvin & Bellan-Santini, 1986. Chevreux collection, From the Bay of Seine to the SE Bay of Biscay (France).

Rodrigues & Dauvin, 1987. Ria Alvor, South Portugal.

Bellan-Santini & Dauvin, 1988. From the Gibraltar Strait to Dover Strait.

Marques & Bellan-Santini, 1991, 1993. South Portugal.

Dauvin & Bellan-Santini, 1996. SE Bay of Biscay.

Garmandia et al., 1998. Ria Ares-Betanzos, Galicia, Spain.

Dauvin, 1999. Whole English Channel.

Martinez & Adarraga, 2003; Martinez et al., 2007. Guipuzcoan continental shelf, Basque Country, Spain.

Gomez-Gesteira & Dauvin, 2005. Ria Ares-Betanzos, Galicia, Spain.

Lourido et al., 2008. Ria de Aldan, Galicia, Spain.

Moreira et al., 2008. Playa America, Galicia, Spain.

Bachelet et al., 2003. South Bay of Biscay.

Le Mao, 2006. Normano-breton Gulf, western English Channel.

Sánchez-Moyano & García-Asencio, I., 2010. Odiel-Tinto estuary, Andalusia, South-western Spain.

Sampaio et al., 2016.

CS and B: 0-300 m.

*7 Ampelisca calypsonis* Bellan-Santini & Kaim-Malka, 1977

Marques & Bellan-Santini, 1991, 1993. South Portugal.

Sampaio et al., 2016.

CS and B: 45-395 m.

*8 Ampelisca cavicoxa* Reid, 1951

Kaim-Malka, 2000: South Bay of Biscay; redescription of the species.

Bachelet et al., 2003. South Bay of Biscay.

Martinez & Adarraga, 2003; Martinez et al., 2007. Guipuzcoan continental shelf, Basque Country, Spain.

CS: 9-50 m.

*9 Ampelisca dalmatina* Karaman, 1975

Marques & Bellan-Santini, 1991, 1993. South Portugal.

Sampaio et al., 2016.

CS and B: 53-383 m.

*10 Ampelisca declivitatis* Mills, 1967

Dauvin & Bellan-Santini, 1996. SE Bay of Biscay.

Bachelet et al., 2003. South Bay of Biscay.

B: 346-1?024 m.

*11 Ampelisca diadema* (Costa, 1853) (=*Ampelisca assimilis* Boeck, 1871)

Dauvin & Bellan-Santini, 1986. Chevreux collection, South Brittany, North of the Bay of Biscay (France). SE Bay of Biscay (France). Rade de Cherbourg (English Channel), France.

Rodrigues & Dauvin, 1987: Ria Alvor, South Portugal

Bellan-Santini & Dauvin, 1988. From the Gibraltar Strait to the Dover Strait.

Marques & Bellan-Santini, 1991, 1993. South Portugal.

Dauvin & Bellan-Santini, 1996. SE Bay of Biscay.

Dauvin, 1999. Whole English Channel.

Bachelet et al., 2003. South Bay of Biscay.

Martinez & Adarraga, 2003; Martinez et al., 2007. Guipuzcoan continental shelf, Basque Country, Spain.

Le Mao, 2006. Normano-breton Gulf, western English Channel.

Sánchez-Moyano & García-Asencio, I., 2010. Odiel-Tinto estuary, Andalusia, South-western Spain.

Sampaio et al., 2016.

CS and B: 10-400 m.

*12 Ampelisca eschrichtii* Krøyer, 1842 (= *Ampelisca dubia* Boeck, 1871; *Ampelisca pacificus* Gurjanova, 1955; *Ampelisca pelagicus* (Stimpson, 1853); *Ampelisca propinqua* Boeck, 1871)

Bellan-Santini & Dauvin, 1988. Celtic Sea offshore Brittany.

B: 250 m.

*13 Ampelisca gibba* Sars, 1883

Dauvin & Bellan-Santini, 1986. Chevreux collection, Bay of Biscay (France).

Bellan-Santini & Dauvin, 1988. Bay of Biscay.

Doubtful species in the English Channel (Dauvin, 1999).

Marques & Bellan-Santini, 1991, 1993. South Portugal.

Dauvin & Bellan-Santini, 1996. SE Bay of Biscay.

Bachelet et al., 2003. South Bay of Biscay

CS and B: 60-500 m.

*14 Ampelisca heterodactyla* Schellenberg, 1925 (=*Ampelisca rubra* Chevreux, 1925)

Marques & Bellan-Santini, 1991, 1993. South Portugal.

Martinez & Adarraga, 2003; Martinez et al., 2007. Guipuzcoan continental shelf, Basque Country, Spain.

Sampaio et al., 2016.

CS: 0-58 m.

*15 Ampelisca latifrons* Schellenberg, 1925

Marques & Bellan-Santini, 1991, 1993. South Portugal.

CS and B: 4-508 m.

*16 Ampelisca lusitanica* Bellan-Santini & Marques, 1986

Bellan-Santini & Marques, 1986. Viana do Castelo, Peniche, west Portugal coast.

Martinez et al., 2007. Guipuzcoan continental shelf, Basque Country, Spain.

CS: 8-37 m.

*17 Ampelisca massiliensis* Bellan-Santini & Kaim-Malka, 1977

Marques & Bellan-Santini, 1991. South Portugal.

CS and B: 110-360 m.

*18 Ampelisca multispinosa* Bellan-Santini & Kaim-Malka, 1977

Marques & Bellan-Santini, 1993. Portuguese continental shelf.

CS: 137 m.

*19 Ampelisca odontoplax* G. O. Sars, 1879

Dauvin & Bellan-Santini, 1986. Chevreux collection, Bay of Biscay (France).

Bellan-Santini & Dauvin, 1988. Bay of Biscay.

B: 1?000 m.

*20 Ampelisca parabyblisoides* Dauvin & Bellan-Santini, 1996

Dauvin & Bellan-Santini, 1996. SE Bay of Biscay.

Bachelet et al., 2003. South Bay of Biscay.

B: 300 m.

*21 Ampelisca pectenata* Reid, 1951 (= *Ampelisca spooneri* Dauvin & Bellan-Santini, 1982)

Dauvin & Bellan-Santini, 1982. Iroise Sea, western Brittany as *A. spooneri*.

Dauvin, 1988. Bay of Morlaix, English Channel as *A. spooneri*.

Bellan-Santini & Dauvin, 1988. Iroise Sea and English Channel as *A. spooneri*.

Marques & Bellan-Santini, 1991, 1993. South Portugal. As *A. spooneri*.

Dauvin, 1999. Whole English Channel as *A. spooneri*.

Kaim-Malka, 2000: South Bay of Biscay; redescription of the species.

Martinez & Adarraga, 2003; Martinez et al., 2007. Guipuzcoan continental shelf, Basque Country, Spain. As *A. spooneri*.

Bachelet et al., 2003. South Bay of Biscay.

Le Mao, 2006. Normano-breton Gulf, western English Channel. As *A. spooneri*.

Cunha et al., 2007. Portuguese continental shelf offshore Aveiro. As *A. spooneri.*

Sampaio et al., 2016.

CS and B: 17-383 m.

*22 Ampelisca provincialis* Bellan-Santini & Kaim-Malka, 1977

Marques & Bellan-Santini, 1993. Portuguese continental shelf.

Sampaio et al., 2016.

CS: 26-173 m.

*23 Ampelisca pseudosarsi* Bellan-Santini & Kaim-Malka, 1977

Marques & Bellan-Santini, 1991, 1993. South Portugal.

Sampaio et al., 2016.

CS: 26-140 m.

*24 Ampelisca pseudospinimana* Bellan-Santini & Kaim-Malka, 1977

Marques & Bellan-Santini, 1991, 1993. South Portugal.

Sampaio et al., 2016.

CS and B: 16-370 m.

*25 Ampelisca pusilla* Sars, 1895

Dauvin & Bellan-Santini, 1996. SE Bay of Biscay.

Bachelet et al., 2003. South Bay of Biscay.

Frustos & Sorbe, 2014. Cape Breton Canyon, SE Bay of Biscay. 724 m.

CS and B: 180-1?097 m.

*26 Ampelisca remora* Bellan-Santini & Dauvin, 1986

Bellan-Santini & Dauvin, 1986. Arosa and Muros Ria, Galicia, Spain.

Marques & Bellan-Santini, 1991, 1993. South Portugal.

Sampaio et al., 2016.

CS: 26- 99 m.

*27 Ampelisca rubella* A. Costa, 1864 (=*Ampelisca serrata* Schellenberg, 1925)

Bellan-Santini & Dauvin, 1988. Iberian coast and south Bay of Biscay.

Marques & Bellan-Santini, 1993. Portuguese continental shelf.

Bachelet et al., 2003. South Bay of Biscay.

CS: 0-130 m.

*28 Ampelisca ruffoi* Bellan-Santini & Kaim-Malka, 1977

Marques & Bellan-Santini, 1991, 1993. South Portugal.

Sampaio et al., 2016.

CS: 97-155 m.

*29 Ampelisca sarsi* Chevreux, 1888

Dauvin & Bellan-Santini, 1986. Chevreux collection, South Brittany, North of the Bay of Biscay (France).

Bellan-Santini & Dauvin, 1988. From the Gibraltar Strait to the Bay of Morlaix.

Marques & Bellan-Santini, 1991, 1993. South Portugal.

Garmandia et al., 1998. Ria Ares-Betanzos, Galicia, Spain. Moreira et al., 2008/ Playa America, Galicia, Spain.

Dauvin, 1999. Roscoff area, English Channel.

Martinez & Adarraga, 2003; Martinez et al., 2007. Guipuzcoan continental shelf, Basque Country, Spain.

Bachelet et al., 2003. South Bay of Biscay.

Sampaio et al., 2016.

CS and B: 10-383 m.

*30 Ampelisca serraticaudata* Chevreux, 1888

Bellan-Santini & Dauvin, 1988. From the Gibraltar Strait to the Galicia (Spain).

Marques & Bellan-Santini, 1991, 1993. South Portugal.

CS: 4-52 m.

*31 Ampelisca sorbei* Dauvin & Bellan-Santini, 1996

Dauvin & Bellan-Santini, 1996. SE Bay of Biscay.

Bachelet et al., 2003. South Bay of Biscay.

CS: 120 m.

*32 Ampelisca spinifer* Reid, 1951

Dauvin & Bellan-Santini, 1986. Chevreux collection, South Brittany, North of the Bay of Biscay (France).

Bellan-Santini & Dauvin, 1988. Iberian coast and Bay of Biscay.

Marques & Bellan-Santini, 1991, 1993. South Portugal.

Dauvin & Bellan-Santini, 1996. SE Bay of Biscay.

Martinez & Adarraga, 2003; Martinez et al., 2007. Guipuzcoan continental shelf, Basque Country, Spain.

Bachelet et al., 2003. South Bay of Biscay.

Sampaio et al., 2016.

CS: 15-182 m.

*33 Ampelisca spinimana* Chevreux, 1900 (=*Ampelisca spinosa* Schellenberg, 1925)

Dauvin & Bellan-Santini, 1986. Chevreux collection, South Brittany, and SE Bay of Biscay (France).

Bellan-Santini & Dauvin, 1988. From the Gibraltar Strait to the west Brittany.

Marques & Bellan-Santini, 1991, 1993. South Portugal.

Dauvin & Bellan-Santini, 1996. SE Bay of Biscay.

Garmandia et al., 1998. Ria Ares-Betanzos, Galicia, Spain.

Dauvin, 1999. Bay of Morlaix, English Channel.

Martinez & Adarraga, 2003; Martinez et al., 2007. Guipuzcoan continental shelf, Basque Country, Spain.

Gomez-Gesteira & Dauvin, 2005. Ria Ares-Betanzos, Galicia, Spain.

Bachelet et al., 2003. South Bay of Biscay;

Le Mao, 2006. Bay of Saint-Brieuc and Dinard, Normano-breton Gulf, western English Channel. Intertidal.

Sampaio et al., 2016.

CS and B: 0-510 m.

*34 Ampelisca spinipes* Boeck, 1861

Dauvin & Bellan-Santini, 1986. Chevreux collection, South Brittany, North of the Bay of Biscay (France).

Rodrigues & Dauvin, 1985. Albufeira and Obidos lagoons, Portugal.

Bellan-Santini & Dauvin, 1988. From the Gibraltar Strait to the Dover Strait.

Marques & Bellan-Santini, 1991, 1993. South Portugal.

Dauvin & Bellan-Santini, 1996. SE Bay of Biscay.

Martinez & Adarraga, 2003; Martinez et al., 2007. Guipuzcoan continental shelf, Basque Country, Spain.

Bachelet et al., 2003. South Bay of Biscay.

Le Mao, 2006. Normano-breton Gulf, western English Channel.

Lourido et al., 2008. Ria de Aldan, Galicia, Spain.

Sánchez-Moyano & García-Asencio, I., 2010. Odiel-Tinto estuary, Andalusia, South-western Spain.

Sampaio et al., 2016.

CS and B: 0-355 m.

*35 Ampelisca tenuicornis* Lilljeborg, 1855

Dauvin & Bellan-Santini, 1986. Chevreux collection, South Brittany, North of the Bay of Biscay (France).

Bellan-Santini & Dauvin, 1988. From the Gibraltar Strait to the Dover Strait.

Marques & Bellan-Santini, 1991, 1993. South Portugal.

Dauvin & Bellan-Santini, 1996. SE Bay of Biscay.

Dauvin, 1999. Whole English Channel.

Bachelet et al., 2003. South Bay of Biscay.

Martinez & Adarraga, 2003; Martinez et al., 2007. Guipuzcoan continental shelf, Basque Country, Spain.

Le Mao, 2006. Normano-breton Gulf, western English Channel.

Lourido et al., 2008. Ria de Aldan, Galicia, Spain.

Moreira et al., 2008. Playa America, Galicia, Spain.

Sampaio et al., 2016.

CS and B: 0-510 m.

*36 Ampelisca troncosoi* Tato, Esquete & Moreira, 2012

Martinez & Adarraga, 2003; Martinez et al., 2007. Guipuzcoan continental shelf, Basque Country, Spain. As *Ampelisca* sp.

Tato et al., 2012. Ensenada de Baiona, Galicia, Spain

CS: 3-11 m.

*37 Ampelisca toulemonti* Dauvin & Bellan-Santini, 1982

Dauvin & Bellan-Santini, 1982. Iroise Sea, western Brittany.

Dauvin & Bellan-Santini, 1986. Chevreux collection, South Brittany, North of the Bay of Biscay (France).

North-Cotentin, Cherbourg area, J.C. Dauvin personal observations.

CS: 10-40 m.

*38 Ampelisca typica* (Bate, 1856)

Dauvin & Bellan-Santini, 1986. Chevreux collection, North Brittany (western part of the English Channel); South Brittany, North of the Bay of Biscay (France).

Bellan-Santini & Dauvin, 1988. From the Gibraltar Strait to the Dover Strait.

Marques & Bellan-Santini, 1991, 1993. South Portugal.

Dauvin & Bellan-Santini, 1996. SE Bay of Biscay.

Dauvin, 1999. Whole English Channel.

Martinez & Adarraga, 2003; Martinez et al., 2007. Guipuzcoan continental shelf, Basque Country, Spain.

Bachelet et al., 2003. South Bay of Biscay.

Le Mao, 2006. Normano-breton Gulf, western English Channel. Intertidal zone.

Lourido et al., 2008. Ria de Aldan, Galicia, Spain.

Sánchez-Moyano & García-Asencio, I., 2010. Odiel-Tinto estuary, Andalusia, South-western Spain.

Sampaio et al., 2016.

CS: 0-174 m.

*39 Ampelisca uncinata* Chevreux, 1887

Bellan-Santini & Dauvin, 1988. Bay of Biscay and off Finistere Cap, Spain

Dauvin & Bellan-Santini, 1996. SE Bay of Biscay.

Bachelet et al., 2003. South Bay of Biscay.

Frustos & Sorbe, 2014. Cape Breton Canyon, SE Bay of Biscay. 1,000 m.

B: 363-1,097 m

*40 Ampelisca verga* Reid, 1951

Dauvin & Bellan-Santini, 1985.

Sampaio et al., 2016.

CS: 25-94 m.

**Comments:** *Ampelisca macrocephala* Liljeborg, 1852 (= *Ampelisca latipes* Stephensen, 1925); a boreal species, not found in the area. The signalisations for the English Channel and offshore Brittany are all erroneous.
